# Supplementary material for: High Prevalence of Myocardial Bridging Detected in an Indonesian Population Using Multi-Detector Computed Tomography
Source: MDPI journal article supplement (doi:10.3390/medicina60050794), 2024-05-10
Supplement: s1 [file s1]

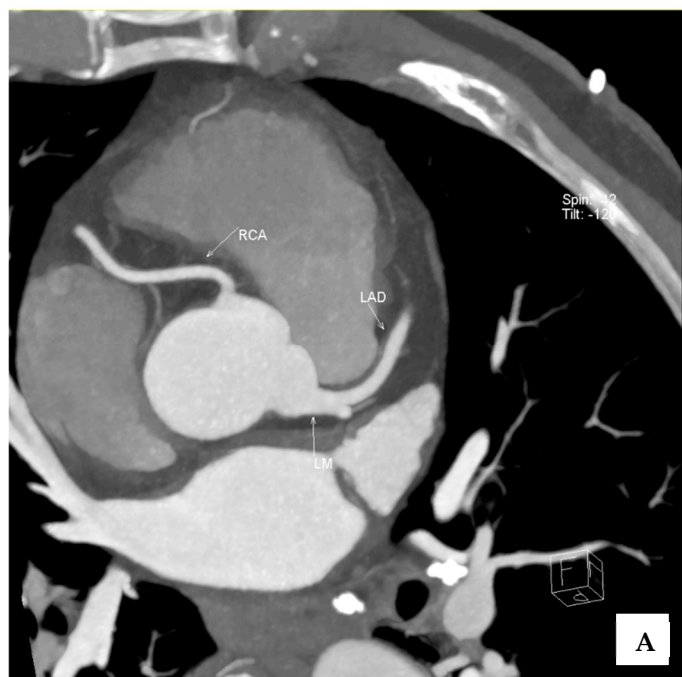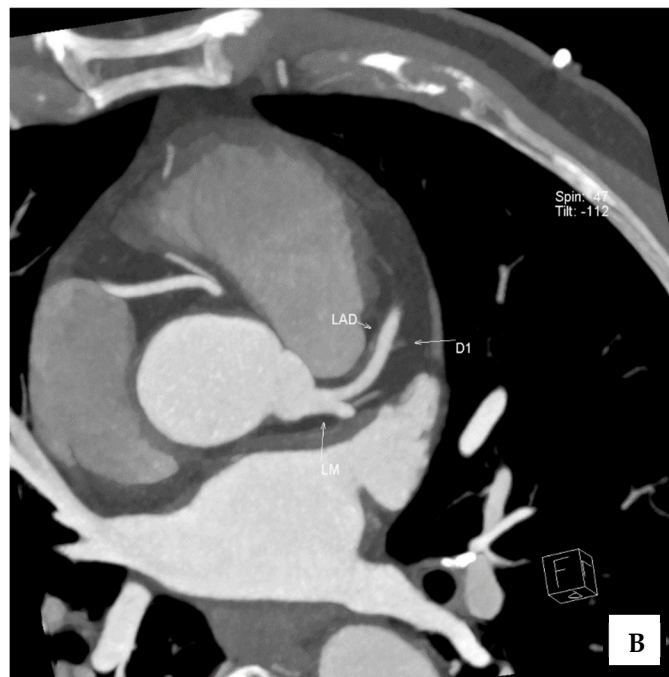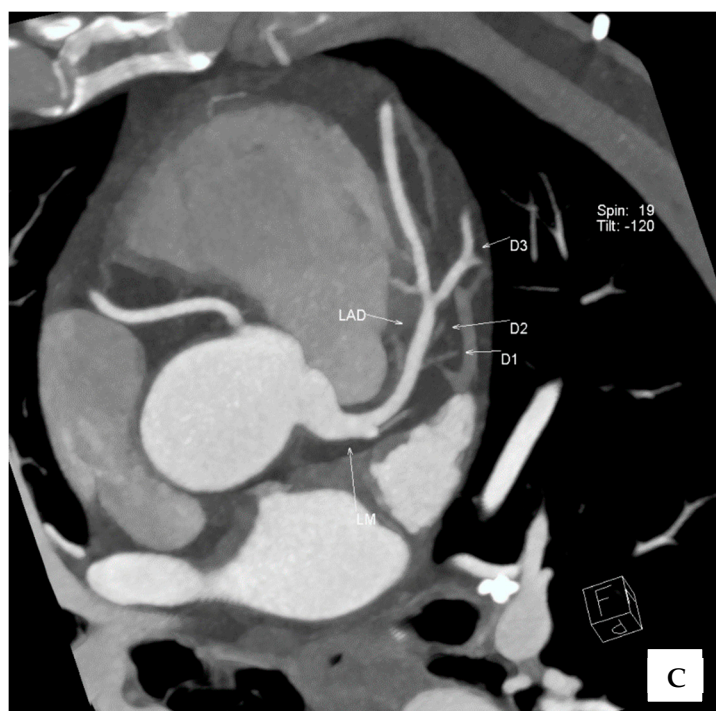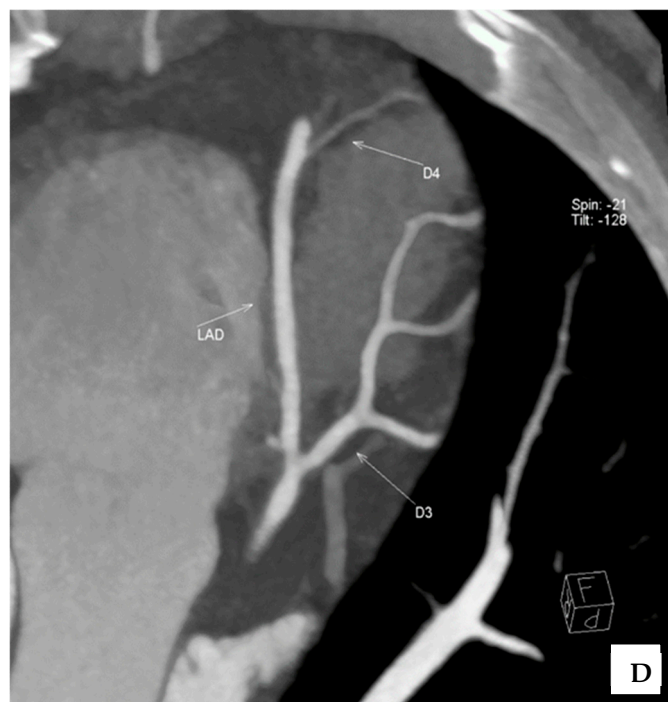

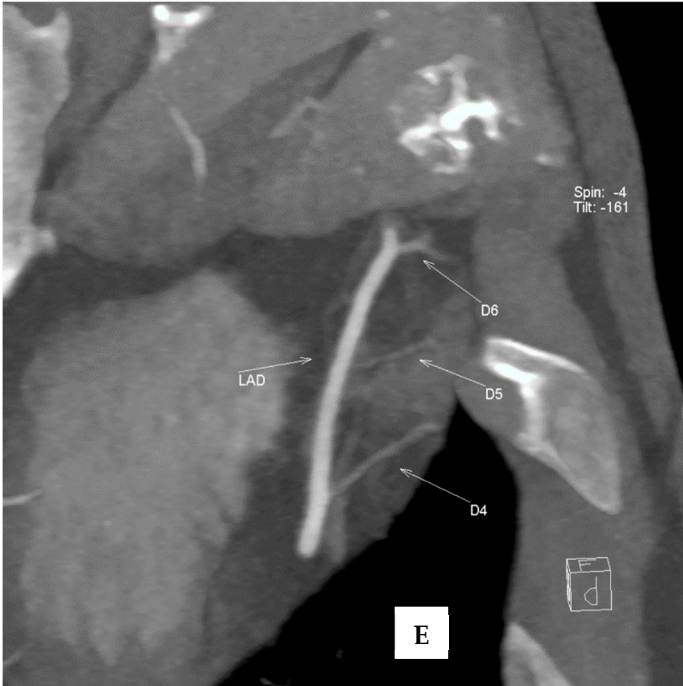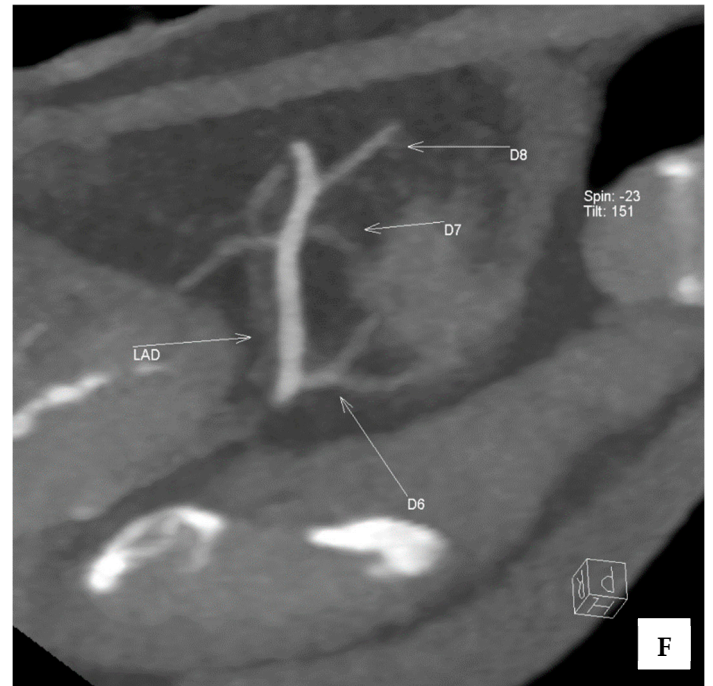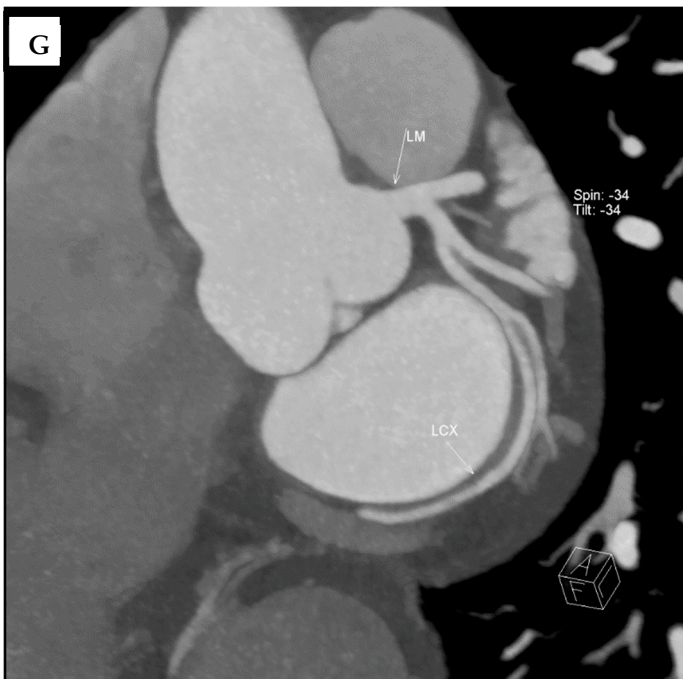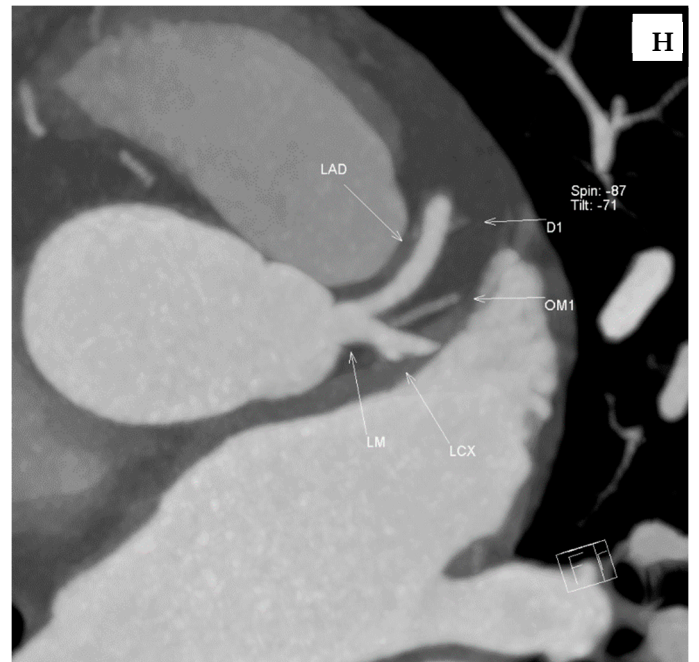



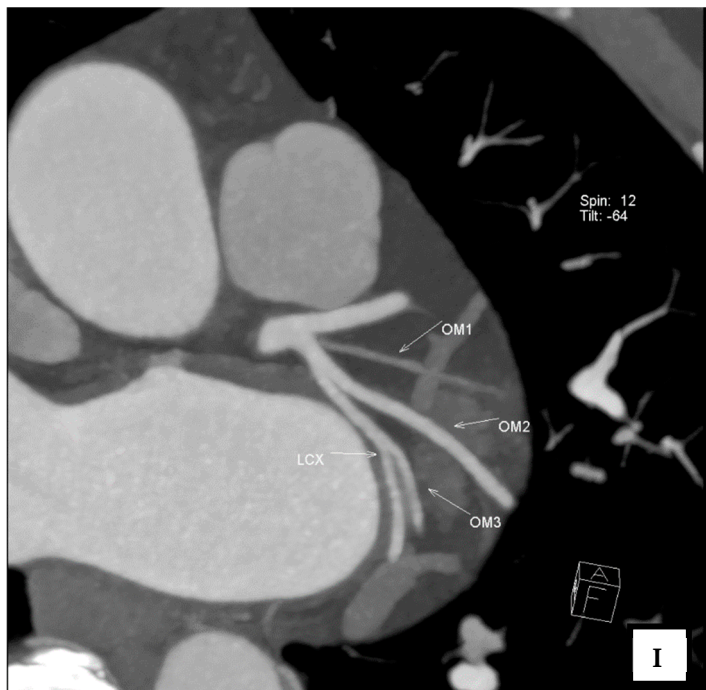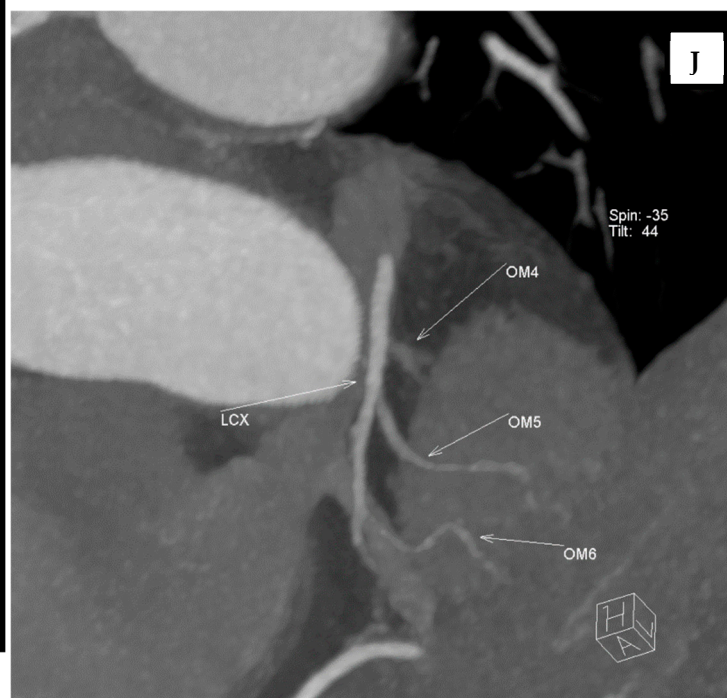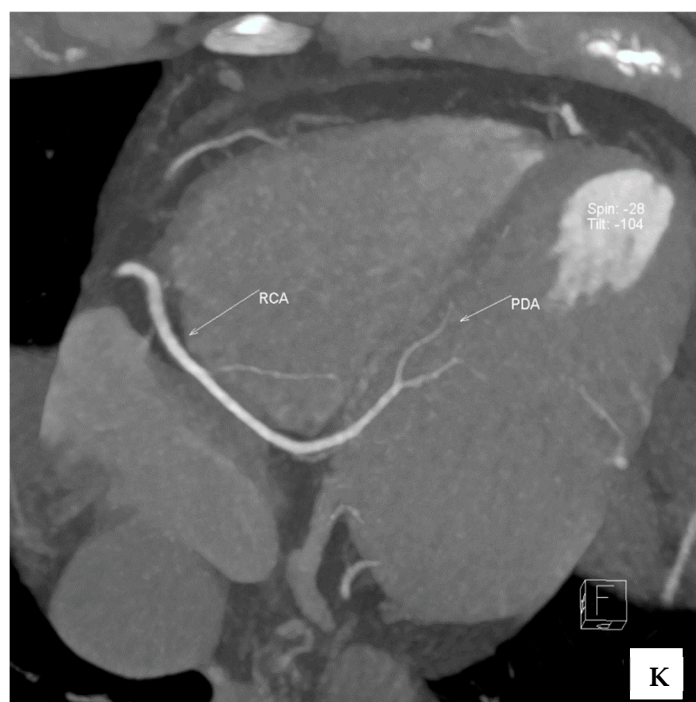

Supplementary Figure S1. Anatomy of the myocardial arteries where (A) shows the right coronary artery (RCA), the left anterior descending (LAD) and left marginal artery (LM); (B) The first diagonal branch of LAD (D1); (C) Shows the D1, second diagonal branch (D2) as well as the third diagonal branch of LAD (D3); (D) This figure shows the fourth diagonal branch of LAD (D4); (E) Shows the fifth diagonal branch (D5) and the sixth diagonal branch of LAD (D6); (F) Shows the seventh diagonal branch (D7) and the eighth diagonal branch of LAD (D8); (G) The left marginal (LM) and left circumflex artery (LCX) are shown here; (H) The first obtuse marginal artery (OM1) can be visualized here along with LCX, LM, LAD, and D1; (I) This figure shows the second obtuse marginal artery (OM2) and the third obtuse marginal artery (OM3); (J) The fourth obtuse marginal artery (OM4), the fifth obtuse marginal artery (OM5), and the sixth obtuse marginal artery (OM6) are visualized here along with LCX; and (K) the posterior descending artery (PDA) can be visualized here
